# Supplementary material for: Orchestration of Intracellular Circuits by G Protein-Coupled Receptor 39 for Hepatitis B Virus Proliferation
Source: MDPI journal article supplement (doi:10.3390/ijms21165661), 2020-08-07
Supplement: s1 [file s1]

**A**

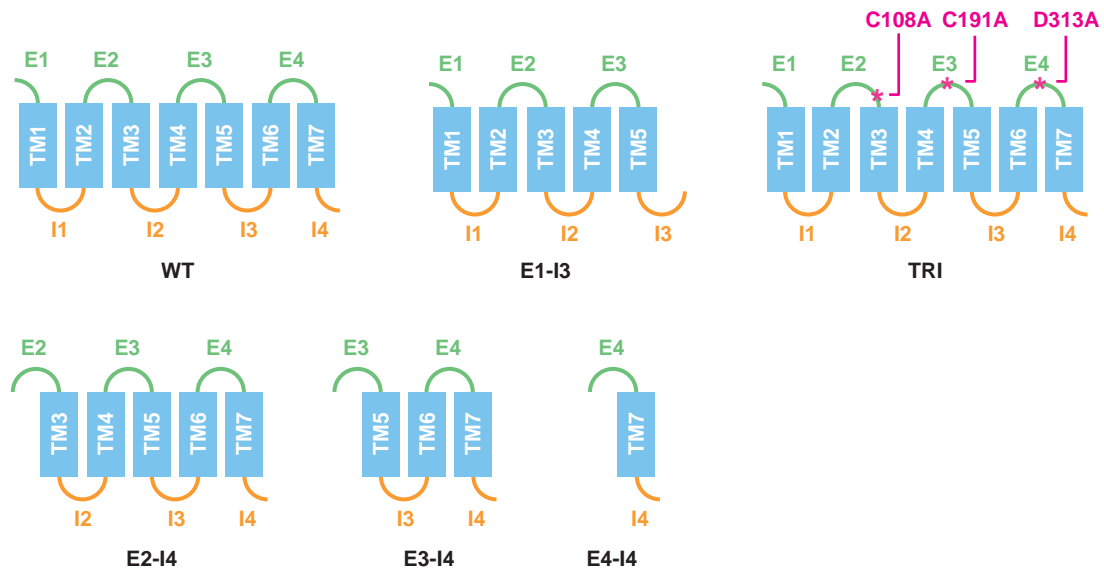

**B**

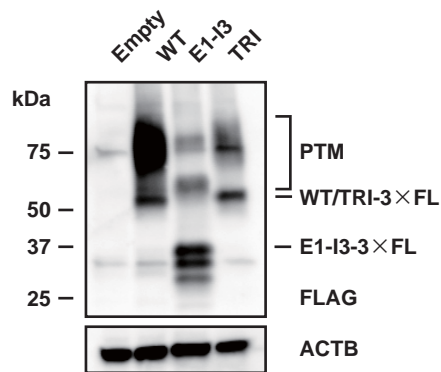

**Supplementary Figure S1**

**A**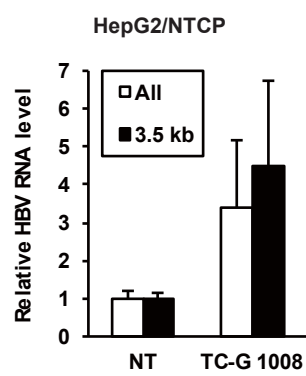**B**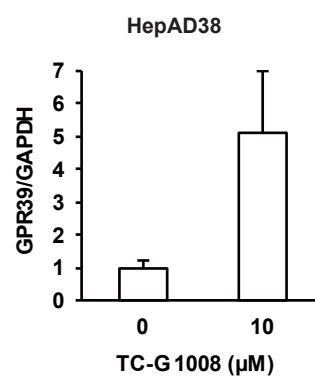**C**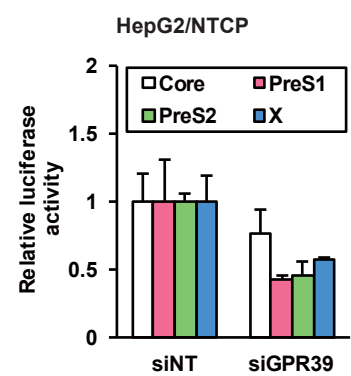

**Supplementary Figure S2**

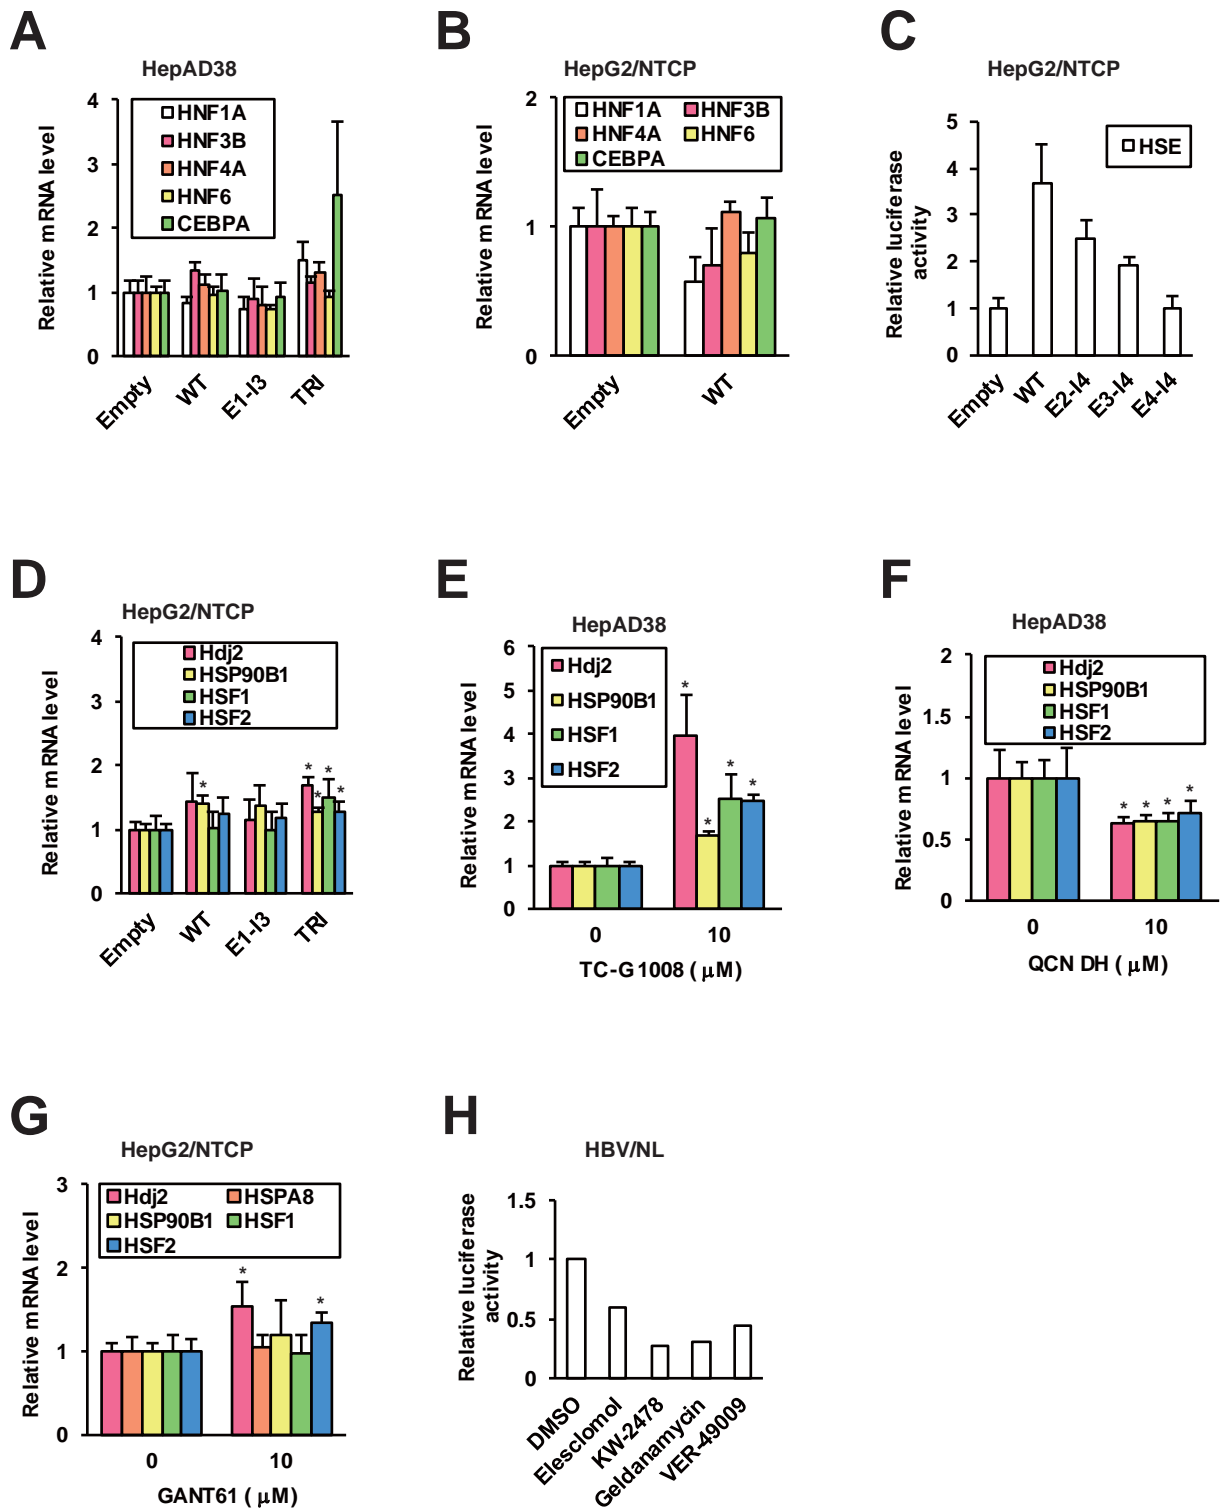

Supplementary Figure S3

## Supplementary Figure Legends

**Supplementary Figure S1. GPR39 expression.** (A) Molecular models of GPR39 proteins. The structures of WT, truncated mutants E1-I3, E2-I4, E3-I4 and E4-I4 and the triple point mutant TRI with mutations, C108A, C191A and D313A in E2, E3 and E4, respectively. (B) The lentiviral expression of GPR39 proteins confirmed by western blot. C-terminally FLAG-tagged WT, E1-I3 and TRI with posttranslational modifications (PTMs) [1] were detected by anti-FLAG antibody (top panel). Unmodified GPR39 proteins according to molecular sizes were indicated by WT/TRI-3×FL and E1-I3-3×FL. The expression of ACTB was detected (bottom panel).

**Supplementary Figure S2. Effects of GPR39 modulation on HBV and HSR.** (A) Effects of TC-G 1008 on HBV in HepG2/NTCP cells. Twenty four hours after the infection with wild type HBV [2], HepG2/NTCP cells were treated with TC-G 1008 at 20  $\mu$ M for 5 days. The relative levels of all and 3.5 kb HBV RNAs were measured by qRT-PCR. (B) The effects of TC-G 1008 in HepAD38 cells. After preculture without Tet for 7 days, the cells were treated with TC-G 1008 at 10  $\mu$ M for 6 days in the presence of Tet. The relative mRNA level of GPR39 was measured by qRT-PCR. (C) Effects of GPR39 knockdown on viral promoter activities. HepG2/NTCP cells transfected with siRNAs to GPR39 for 3 days were transfected with reporter plasmids carrying viral promoters for 2 days, and the relative luciferase activities were measured.

**Supplementary Figure S3. Effects of overexpression and pharmacological modulation of**

**GPR39 on gene expression, HSR and HBV.** (A) The effects of lentivirally overexpressed

GPR39 proteins on liver-enriched transcription factors in HepAD38 cells. After preculture

without Tet for 7 days, the cells were transduced with the lentiviruses for 6 days. The relative

mRNA levels were measured by qRT-PCR. (B) The effects of lentivirally overexpressed GPR39

on liver-enriched transcription factors in HepG2/NTCP cells. After the transduction with the

lentiviruses for the empty control and GPR39 for 2 days, the relative mRNA levels were

measured by qRT-PCR. (C) Effects of truncated GPR39 proteins on HSR. The reporter plasmid

pGL4.41 was cotransfected with the empty control p3xFLAG-CMV-14, WT or N-terminally

truncated forms of GPR39, E2-I4, E3-I4 and E4-I4 into HepG2/NTCP-Myc cells for 48 h,

followed by the measurement of relative luciferase activities. (D) The effects of lentivirally

overexpressed GPR39 proteins on HSPs and HSFs in HepG2/NTCP cells. The cells were

transduced with the lentiviruses for 2 days and the relative mRNA levels were measured by qRT-

PCR. (E) The effects of TC-G 1008 on the expression of HSPs and HSFs in HepAD38 cells.

After the treatment with TC-G 1008 at 10  $\mu$ M for 6 days in the presence of Tet following

preculture without Tet for 7 days, the relative mRNA levels were measured by qRT-PCR. (F)

The effects of QCN on the expression of HSPs and HSFs. After preculture without Tet for 7

days, HepAD38 cells were treated with QCN DH at 10  $\mu$ M for 6 days in the presence of Tet. The

relative mRNA levels were measured by qRT-PCR. (G) Effects of GANT61 on the expression of

HSPs and HSFs. After the treatment of HepG2/NTCP cells with GANT61 at 10  $\mu$ M for 2 days,

the relative mRNA levels were measured by qRT-PCR. (H) Antiviral activities of approved HSP

inhibitors. The effects of elesclomol, KW-2478, geldanamycin and VER-49009 on HBV/NL in

our recent chemical screen [2] were demonstrated. Statistical significances with  $P < 0.05$  to controls were indicated by asterisks.

## Supplementary References

1. Holliday, N. D.; Holst, B.; Rodionova, E. A.; Schwartz, T. W.; Cox, H. M., Importance of constitutive activity and arrestin-independent mechanisms for intracellular trafficking of the ghrelin receptor. *Mol Endocrinol* **2007**, 21, (12), 3100-12.
2. Harada, K.; Nishitsuji, H.; Ujino, S.; Shimotohno, K., Identification of KX2-391 as an inhibitor of HBV transcription by a recombinant HBV-based screening assay. *Antiviral Res* **2017**, 144, 138-146.

**Supplementary Table S1. The top five significant pathways connected to the GPR39-GSK3B axis and CRHR2**

| Pathway name                                    | Entities |       |          |          | Reactions |          |
|-------------------------------------------------|----------|-------|----------|----------|-----------|----------|
|                                                 | Found    | Ratio | P-value  | FDR      | Found     | Ratio    |
| Attenuation phase                               | 12/47    | 0.003 | 3.33e-16 | 2.92e-13 | 3/5       | 3.94e-04 |
| Regulation of HSF1-mediated heat shock response | 15/113   | 0.008 | 6.66e-16 | 2.92e-13 | 9/14      | 0.001    |
| HSF1-dependent transactivation                  | 12/59    | 0.004 | 4.11e-15 | 1.20e-12 | 4/8       | 6.30e-04 |
| Cellular response to heat stress                | 15/135   | 0.009 | 7.99e-15 | 1.75e-12 | 14/29     | 0.002    |
| HSF1 activation                                 | 10/43    | 0.003 | 2.40e-13 | 4.20e-11 | 1/7       | 5.51e-04 |

**Supplementary Table S2. The top 10 significant pathways connected to GALR2**

| Pathway name                                                       | Entities |       |          |          | Reactions |          |
|--------------------------------------------------------------------|----------|-------|----------|----------|-----------|----------|
|                                                                    | Found    | Ratio | P-value  | FDR      | Found     | Ratio    |
| Post-chaperonin tubulin folding pathway                            | 17/25    | 0.002 | 1.11e-16 | 2.22e-15 | 9/9       | 7.09e-04 |
| RHO GTPase activate IQGAPs                                         | 22/36    | 0.002 | 1.11e-16 | 2.22e-15 | 5/5       | 3.94e-04 |
| Formation of tubulin folding intermediates by CCT/TriC             | 17/30    | 0.002 | 1.11e-16 | 2.22e-15 | 2/2       | 1.57e-04 |
| Cooperation of Prefoldin and TriC/CCT in actin and tubulin folding | 18/37    | 0.003 | 1.11e-16 | 2.22e-15 | 6/6       | 4.72e-04 |
| Prefoldin mediated transfer of substrate to CCT/TriC               | 13/29    | 0.002 | 1.11e-16 | 2.22e-15 | 2/2       | 1.57e-04 |
| Carboxyterminal post-translational modifications of tubulin        | 18/52    | 0.004 | 1.11e-16 | 2.22e-15 | 6/6       | 4.72e-04 |
| HSP90 chaperone cycle for steroid hormone receptors (SHR)          | 22/70    | 0.005 | 1.11e-16 | 2.22e-15 | 12/12     | 9.45e-04 |
| Recruitment of NuMA to mitotic centrosomes                         | 27/97    | 0.007 | 1.11e-16 | 2.22e-15 | 2/2       | 1.57e-04 |
| Protein folding                                                    | 24/106   | 0.007 | 1.11e-16 | 2.22e-15 | 22/28     | 0.002    |
| Chaperonin-mediated protein folding                                | 24/100   | 0.007 | 1.11e-16 | 2.22e-15 | 13/19     | 0.001    |



**Supplementary Table S3. The top 10 significant pathways connected to the NPBWR1-MC4R axis**

| Pathway name                                                       | Entities |       |          |          | Reactions |          |
|--------------------------------------------------------------------|----------|-------|----------|----------|-----------|----------|
|                                                                    | Found    | Ratio | P-value  | FDR      | Found     | Ratio    |
| Post-chaperonin tubulin folding pathway                            | 17/25    | 0.002 | 1.11e-16 | 1.44e-15 | 9/9       | 7.09e-04 |
| Formation of tubulin folding intermediates by CCT/TriC             | 17/30    | 0.002 | 1.11e-16 | 1.44e-15 | 2/2       | 1.57e-04 |
| Prefoldin mediated transfer of substrate to CCT/TriC               | 12/29    | 0.002 | 1.11e-16 | 1.44e-15 | 2/2       | 1.57e-04 |
| Carboxyterminal post-translational modifications of tubulin        | 18/52    | 0.004 | 1.11e-16 | 1.44e-15 | 6/6       | 4.72e-04 |
| HSP90 chaperone cycle for steroid hormone receptors (SHR)          | 20/70    | 0.005 | 1.11e-16 | 1.44e-15 | 12/12     | 9.45e-04 |
| Recruitment of NuMA to mitotic centrosomes                         | 26/97    | 0.007 | 1.11e-16 | 1.44e-15 | 2/2       | 1.57e-04 |
| MHC class II antigen presentation                                  | 19/148   | 0.01  | 1.11e-16 | 1.44e-15 | 21/26     | 0.002    |
| Protein folding                                                    | 18/106   | 0.007 | 1.11e-16 | 1.44e-15 | 20/28     | 0.002    |
| Activation of AMPK downstream of NMDARs                            | 19/34    | 0.002 | 1.11e-16 | 1.44e-15 | 2/3       | 2.36e-04 |
| Cooperation of Prefoldin and TriC/CCT in actin and tubulin folding | 17/37    | 0.003 | 1.11e-16 | 1.44e-15 | 4/6       | 4.72e-04 |

**Supplementary Table S4. Primers for construction of plasmids**

| <b>Name</b>      | <b>Sequence</b>                                      |
|------------------|------------------------------------------------------|
| Nested-GPR39-F   | AAGTCTTTGGACCTGGTAGC                                 |
| Nested-GPR39-R   | TGACGTTTTCTTAGGGCTGG                                 |
| EcoRI-GPR39-F    | TTCGAATTCGCCACCATGGCTTCACCCAGCCTCCCGGGC<br>AGTGAC    |
| XbaI-GPR39-R     | AATTCTAGAACTTCATGCTCCTGAAAACCATTCCTCTGC              |
| XbaI-GPR39-I3-R  | AATTCTAGAGATGATGGTCTGCCTCCTGGCGGTCCTGCT              |
| EcoRI-GPR39-E2-F | TTCGAATTCGCCACCATGGAGTTCTACAGCATCATCTGG<br>AATCCCCTG |
| EcoRI-GPR39-E3-F | TTCGAATTCGCCACCATGGCCATGGGTACTGAGTACCCC<br>CTGGTGAAC |
| EcoRI-GPR39-E4-F | TTCGAATTCGCCACCATGGCTGCGGCCAAACCCAAGCAC<br>GACTGGACG |
| GPR39-C108A-F    | CTACACCCTGTCCGCCAAGCTGCACACTTTC                      |
| GPR39-C108A-R    | GAAAGTGTGCAGCTTGGCGGACAGGGTGTAG                      |
| GPR39-C191A-F    | CCGGGGTCTCACTGCCAACCGCTCCAGCAC                       |
| GPR39-C191A-R    | GTGCTGGAGCGGTTGGCAGTGAGACCCCGG                       |
| GPR39-D313A-F    | CAAACCCAAGCACGCCTGGACGAGGTCCTAC                      |
| GPR39-D313A-R    | GTAGGACCTCGTCCAGGCGTGCTTGGGTTTG                      |
| EcoRI-HBx-F1     | TTCGAATTCGCCACCATGGCTGCTAGGGTGTGCTGCCAA<br>CTGG      |
| XbaI-HBx-R2      | AATTCTAGAGGCAGAGGTGAAAAAGTTGCATGGTG                  |
| GPR39-INF-F      | CCGGTCTCGAGAATTATGGCTTCACCCAGCCTC                    |
| GPR39-INF-R      | TAACTCTAGAGGATCCTACTTGTCATCGTCATCC                   |

**Supplementary Table S5. Primers for qRT-PCR**

| <b>Name</b> | <b>Sequence</b>         |
|-------------|-------------------------|
| HBV-ALL-F   | GGGTGTGCTGCCAACTGGATCC  |
| HBV-ALL-R   | GTGAAGCGAAGTGCACACGGTC  |
| HBV-3.5KB-F | GACCACCAAATGCCCCCTATC   |
| HBV-3.5KB-R | GATTGAGATCTTCTGCGACGC   |
| GPR39-F     | CGTCCAGCTACACCCTGTC     |
| GPR39-R     | CCAGACGAAGCCAATCAGC     |
| HNF1A-F     | AACACCTCAACAAGGGCACTC   |
| HNF1A-R     | CCCCACTTGAAACGGTTCCT    |
| HNF3B-F     | GGAGCAGCTACTATGCAGAGC   |
| HNF3B-R     | CGTGTTTCATGCCGTTTCATCC  |
| HNF4A-F     | CGAAGGTCAAGCTATGAGGACA  |
| HNF4A-R     | ATCTGCGATGCTGGCAATCT    |
| HNF6-F      | GAACATGGGAAGGATAGAGGCA  |
| HNF6-R      | GTAGAGTTCGACGCTGGACAT   |
| CEBPA-F     | GTCGGTGGACAAGAACAGCA    |
| CEBPA-R     | ATTGTCACTGGTCAGCTCCAG   |
| CEBPB-F     | GCACAGCGACGAGTACAAGA    |
| CEBPB-R     | TGCTTGAACAAGTTCCGCAG    |
| Hdj1-F      | CTCTGGACGGCAGGACGATA    |
| Hdj1-R      | TCTTGATGTCTGGGGAATCCTT  |
| Hdj2-F      | ACTGGAGCCAGGCGATATTAT   |
| Hdj2-R      | CTTCAACGAGCTGTATGTCCAT  |
| HSPA8-F     | ACCTACTCTTGTGTGGGTGTT   |
| HSPA8-R     | GACATAGCTTGGAGTGGTTCG   |
| HSP90B1-F   | GCTGACGATGAAGTTGATGTGG  |
| HSP90B1-R   | CATCCGTCCTTGATCCTTCTCTA |
| HSF1-F      | CCATGAAGCATGAGAATGAGGC  |
| HSF1-R      | CTTGTTGACGACTTTCTGTTGC  |
| HSF2-F      | AGAATGAGTCCCTTTGGAAGGA  |
| HSF2-R      | TTCTTTTGGGCTCCATTAGTGTT |
| GADPH-F2    | AAGGTGAAGGTCGGAGTCAAC   |
| GADPH-R2    | GGGGTCATTGATGGCAACAATA  |
